# Supplementary material
Source: PubMed Central journal article supplement (PMC5340342)
Supplement: 1335FigureS1.pdf [file 1335FigureS1.pdf]

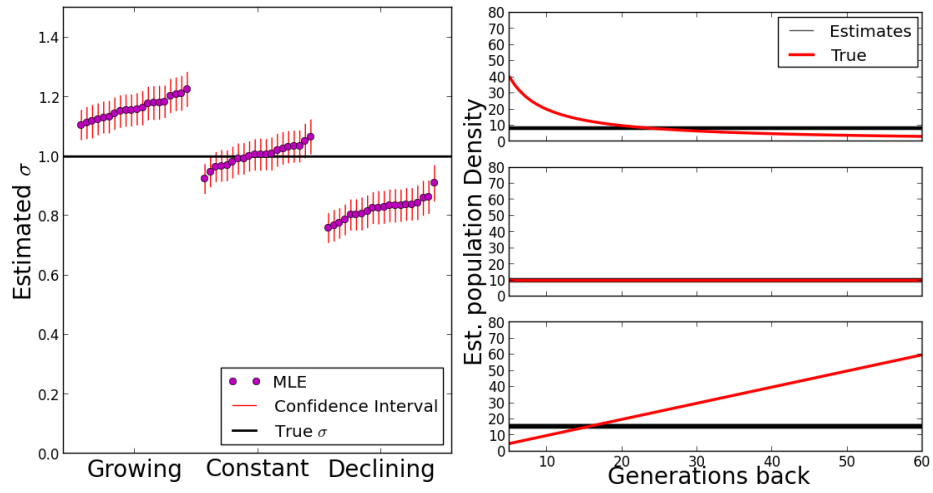

**Figure S1:** Fitting a constant population models: As in Fig. 7, in every run we simulated IBD-sharing between 625 chromosomes of length 150cM picked randomly from an initial sample grid with distance 2 on an overall torus with 90 nodes per axis. We simulated the same demographic scenarios ( $n(t) = t$ ,  $n(t) = 10$  and  $n(t) = 200/t$ , and Laplace dispersal with  $\sigma = 1$ ). Here, parameters were estimated by (wrongly) fitting a model of constant population density.
