# Supplementary material
Source: PubMed Central journal article supplement (PMC5340342)
Supplement: 1335FigureS2.pdf [file 1335FigureS2.pdf]

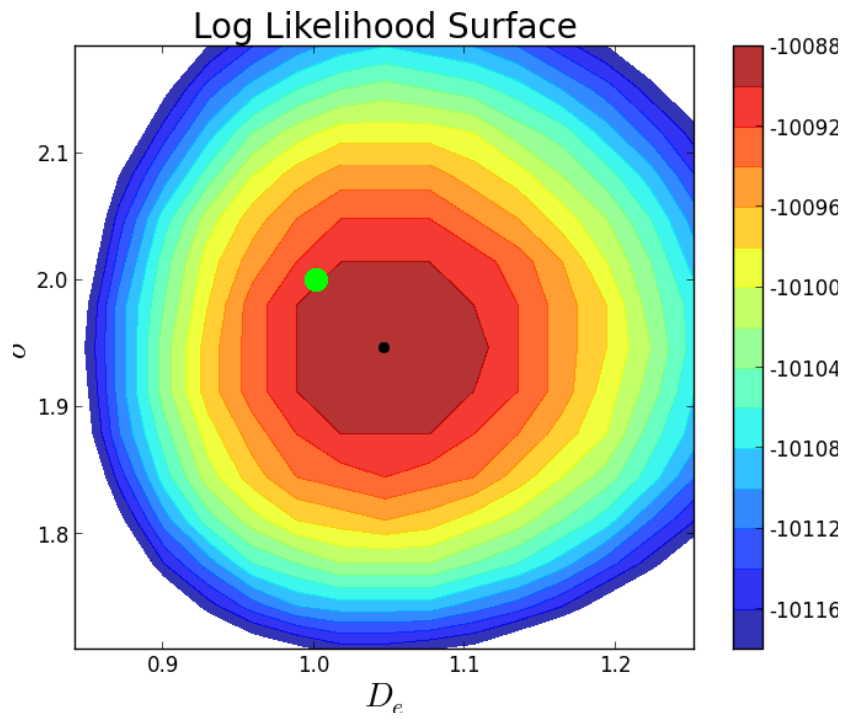

**Figure S2:** Likelihood surface: The likelihood surface based on block-sharing data from a random single simulation run as described in Fig. 6 with 625 samples of 150 cM chromosomes. Every color represents two Log-Likelihoods.
