# Supplementary material
Source: PubMed Central journal article supplement (PMC5340342)
Supplement: 1335FigureS3.pdf [file 1335FigureS3.pdf]

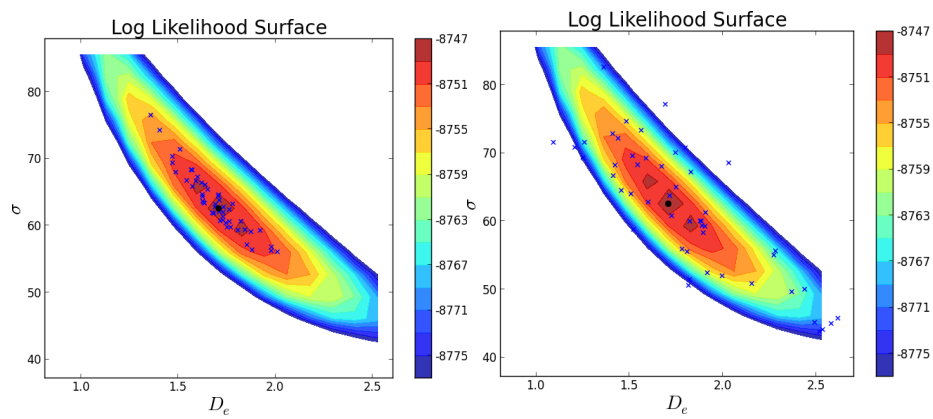

**Figure S3:** Bootstrapping POPRES-data: 50 bootstraps of the model of quick growth ( $D(t) = \frac{1}{t}$ ) plotted against the inferred likelihood surface of this model. Left: Bootstrap over blocks - every block was resampled Poisson with mean 1. Right: Bootstrap over country pairs - data from whole country pairs resampled Poisson with mean 1.
