# Supplementary material
Source: PubMed Central journal article supplement (PMC5340342)
Supplement: 1335FigureS4.pdf [file 1335FigureS4.pdf]

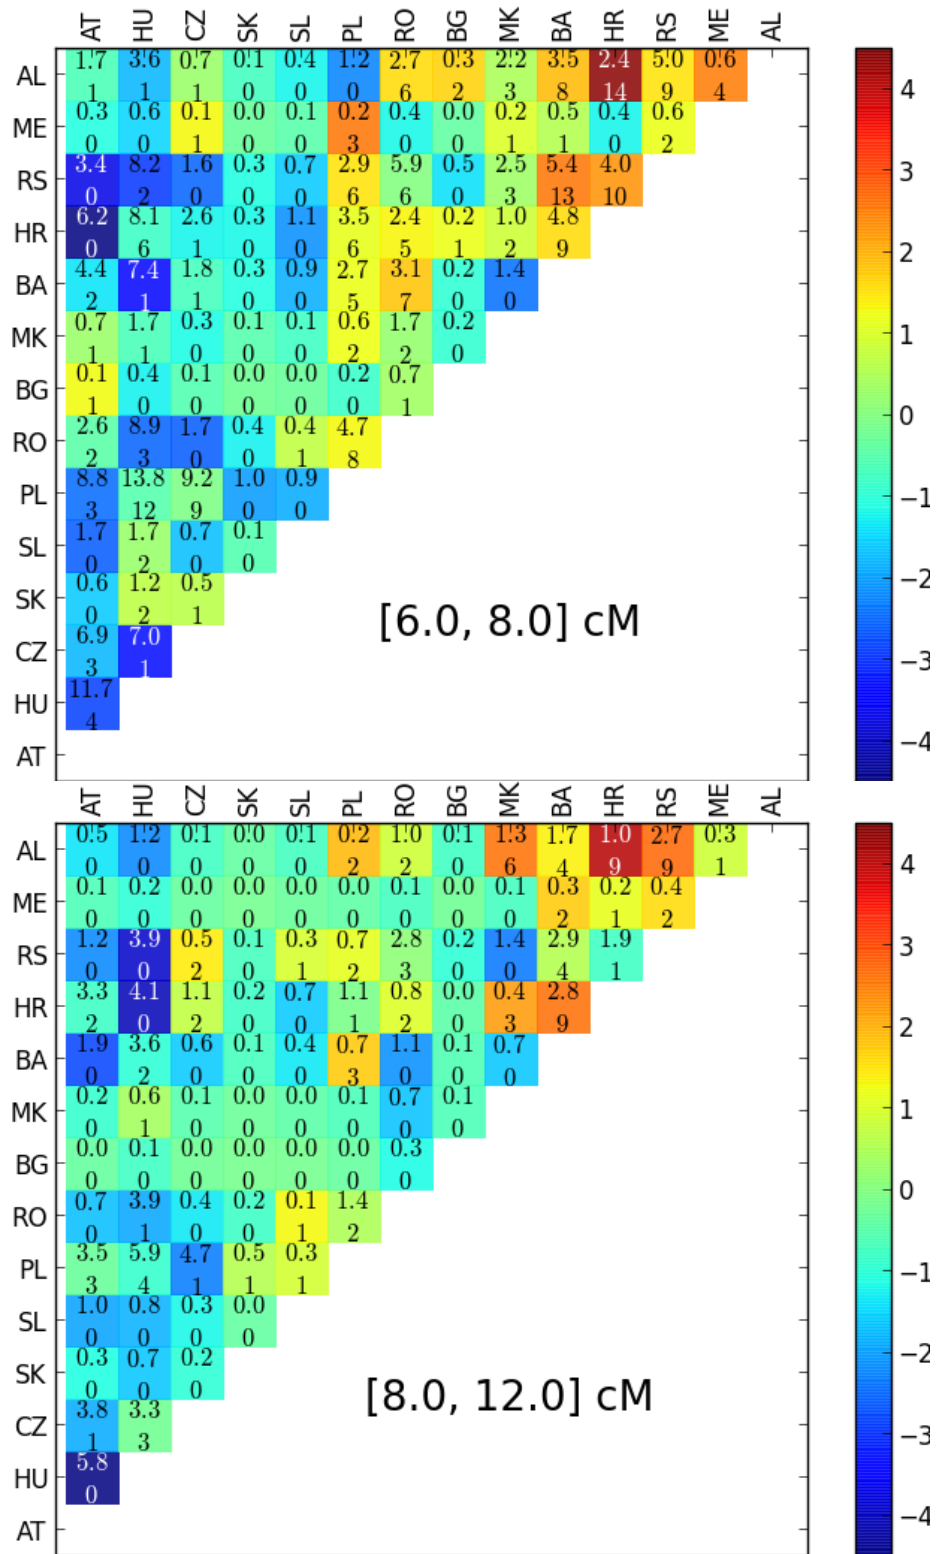

**Figure S4:** Residuals of best fit: As described in Fig. 10, residuals of the best fit for blocks of length 6 – 8 cM and 8 – 12 cM. AT: Austria, HU: Hungary, CZ: Czech Republic, SK: Slovakia, SL: Slovenia, PL: Poland, RO: Romania, BG: Bulgaria, MK: Macedonia, BA: Bosnia, HR: Croatia, RS: Serbia, ME: Montenegro, AL: Albania
